# Supplementary material
Source: publisher figshare collection journal article supplement (https://karger.figshare.com/articles/dataset/_/5121307)

**Supplementary Figure 1.** Flow chart of experimental methods and sample organization for microarray analysis.

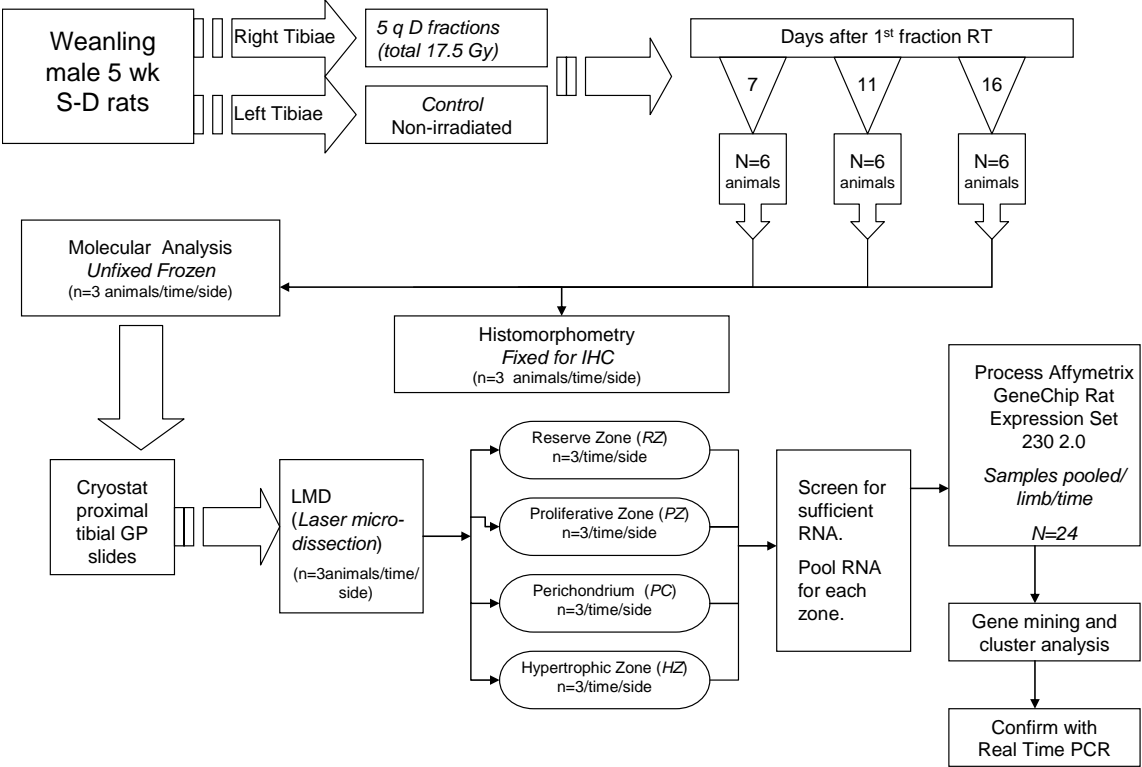

**Supplementary Figure 2.** 3x2 Self-organizing map of proliferative zone (PZ) showing cluster (2,1) clusters displaying the pattern of decreasing expression from 7 to 11 to 16 days.

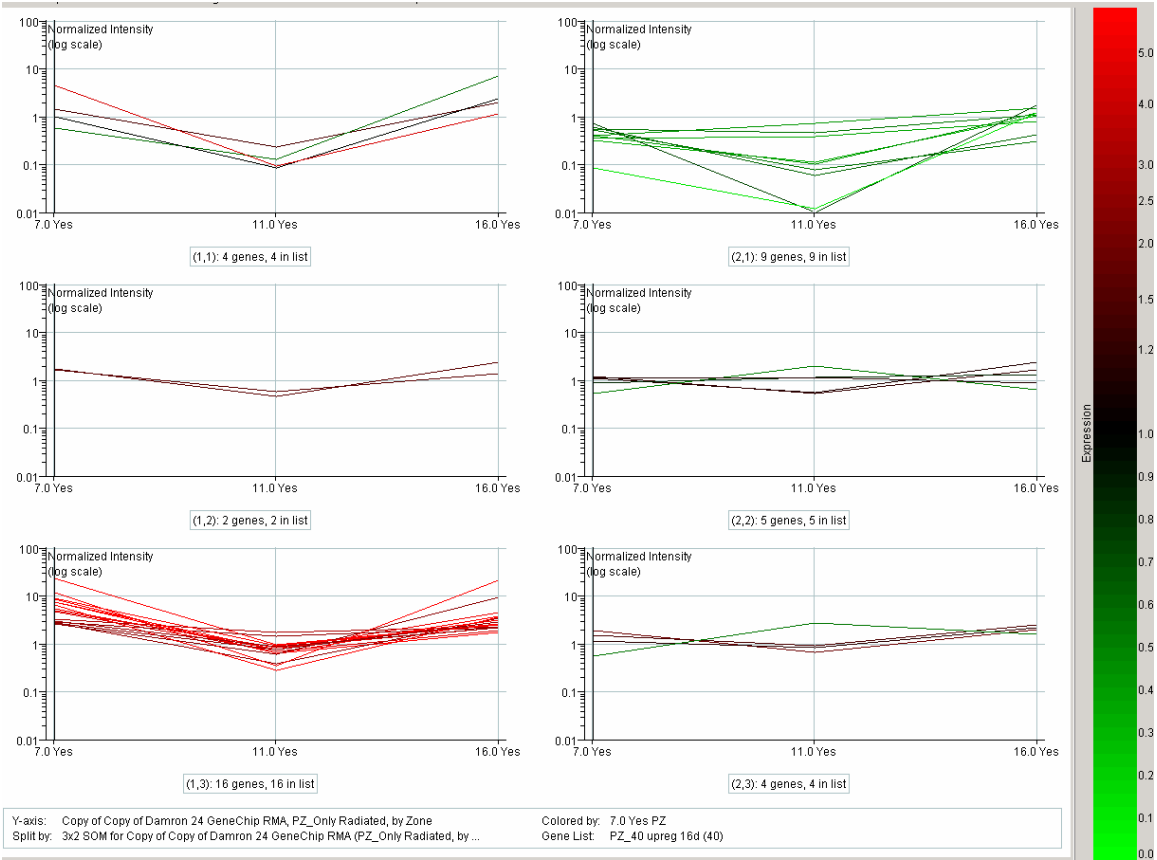

**Supplementary Figure 3.** 3x2 Self-organizing map of perichondrial zone (PC) showing clusters (1,1) and (1,2) displaying the pattern of decreasing expression from 7 to 11 to 16 days.

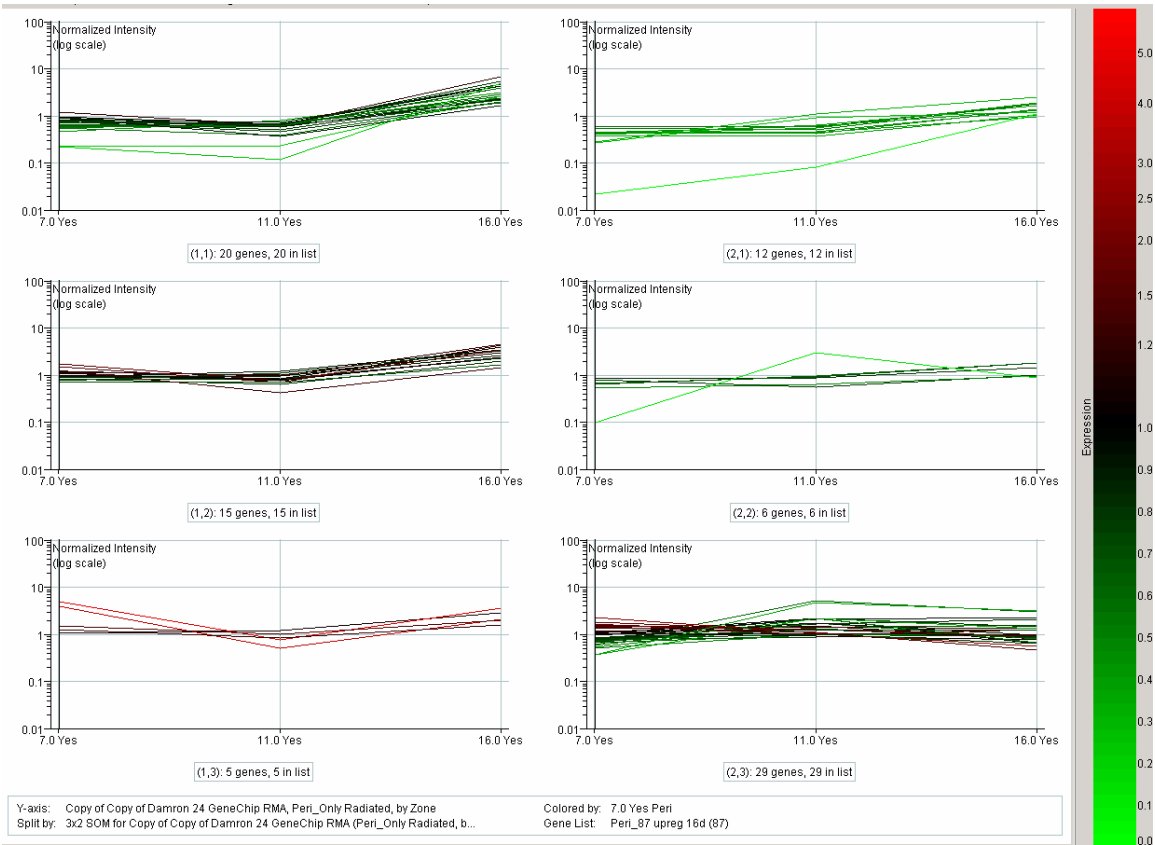

**Supplementary Figure 4.** 3x2 Self-organizing map of hypertrophic zone (HZ) showing (2,2) clusters displaying the pattern of decreasing expression from 7 to 11 to 16 days.

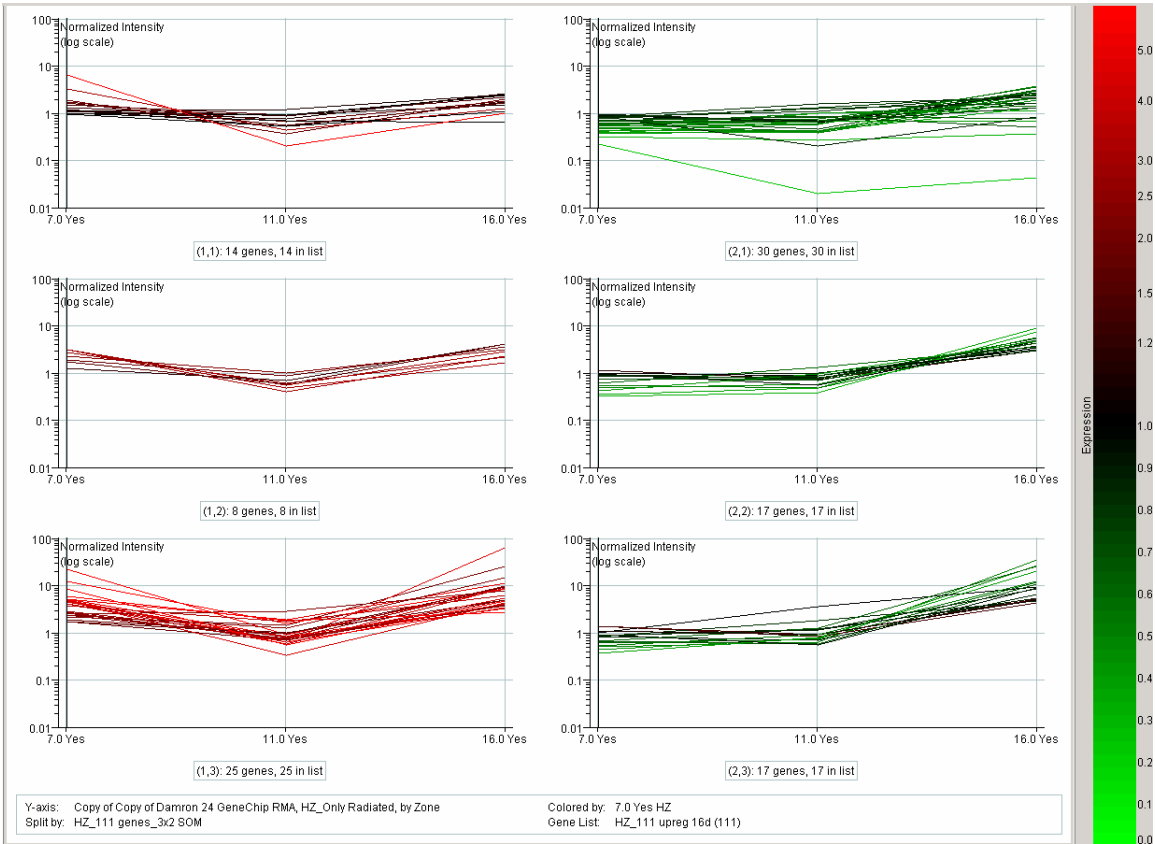

Supplement: Supplementary file 1 [file 1]
