# Supplementary material
Source: publisher figshare collection journal article supplement (https://karger.figshare.com/articles/dataset/_/5121307)
Supplement: Supplementary file 2 [file 1]

Supplementary Table 1. Reserve Zone (RZ) 134 Enriched Pathways after Differential Expression Analysis of 259 Genes in Gene List.

| GO Parent Category                                                                 | Go Parent Term                                                                              | GO (Child) Term                                                                                                     | GO ID                                        | % of Array | % of list | Fold Enrichment | P-Value  | Total Probe Sets On Array | Probe Sets in Your List |    |
|------------------------------------------------------------------------------------|---------------------------------------------------------------------------------------------|---------------------------------------------------------------------------------------------------------------------|----------------------------------------------|------------|-----------|-----------------|----------|---------------------------|-------------------------|----|
| Biological Process                                                                 | Biological adhesion/Biological regulation/Cellular process                                  | regulation of cell-matrix adhesion                                                                                  | 1952                                         | 0.08%      | 0.77%     | 9.58            | 0.017224 | 25                        | 2                       |    |
|                                                                                    |                                                                                             | negative regulation of cell-matrix adhesion                                                                         | 1953                                         | 0.04%      | 0.77%     | 21.78           | 0.003848 | 11                        | 2                       |    |
|                                                                                    |                                                                                             | regulation of hemostatic process                                                                                    | 32844                                        | 0.17%      | 1.16%     | 6.78            | 0.008918 | 5                         | 3                       |    |
|                                                                                    |                                                                                             | erythrocyte homeostasis                                                                                             | 34101                                        | 0.21%      | 1.54%     | 7.48            | 0.001842 | 64                        | 4                       |    |
|                                                                                    |                                                                                             | homeostasis of number of cells                                                                                      | 48872                                        | 0.34%      | 1.89%     | 5.85            | 0.001727 | 106                       | 5                       |    |
|                                                                                    |                                                                                             | Biological regulation/Biological adhesion/Cellular process                                                          | positive regulation of cell adhesion         | 7162       | 0.18%     | 1.54%           | 8.40     | 0.002113                  | 57                      | 4  |
|                                                                                    |                                                                                             | positive regulation of mesenchymal cell proliferation                                                               | 2053                                         | 0.07%      | 0.77%     | 10.41           | 0.014770 | 23                        | 2                       |    |
|                                                                                    |                                                                                             | transforming growth factor beta receptor signaling pathway                                                          | 7179                                         | 0.21%      | 1.16%     | 5.44            | 0.015637 | 66                        | 3                       |    |
|                                                                                    |                                                                                             | integrin-mediated signaling pathway                                                                                 | 7229                                         | 0.14%      | 0.77%     | 5.57            | 0.044623 | 43                        | 2                       |    |
|                                                                                    |                                                                                             | regulation of mesenchymal cell proliferation                                                                        | 10464                                        | 0.07%      | 0.77%     | 10.41           | 0.014770 | 23                        | 2                       |    |
|                                                                                    | Biological regulation/Cellular process                                                      | regulation of transforming growth factor beta receptor signaling pathway                                            | 17015                                        | 0.10%      | 0.77%     | 7.72            | 0.025396 | 31                        | 2                       |    |
|                                                                                    |                                                                                             | negative regulation of Wnt1 receptor signaling pathway                                                              | 30178                                        | 0.10%      | 0.77%     | 7.98            | 0.023956 | 30                        | 2                       |    |
|                                                                                    |                                                                                             | regulation of cell redox homeostasis                                                                                | 39053                                        | 0.03%      | 0.77%     | 29.92           | 0.001852 | 8                         | 2                       |    |
|                                                                                    |                                                                                             | cell redox homeostasis                                                                                              | 45454                                        | 0.20%      | 1.54%     | 7.60            | 0.001741 | 63                        | 4                       |    |
|                                                                                    |                                                                                             | positive regulation of Ras protein signal transduction                                                              | 46579                                        | 0.09%      | 0.77%     | 8.25            | 0.022546 | 29                        | 2                       |    |
|                                                                                    |                                                                                             | positive regulation of small GTPase mediated signal transduction                                                    | 51057                                        | 0.10%      | 0.77%     | 7.72            | 0.025396 | 31                        | 2                       |    |
|                                                                                    |                                                                                             | positive regulation of muscle cell differentiation                                                                  | 51149                                        | 0.02%      | 0.77%     | 39.90           | 0.001009 | 6                         | 2                       |    |
|                                                                                    |                                                                                             | Biological regulation/Cellular process/Developmental process                                                        | erythrocyte development                      | 48821      | 0.04%     | 0.77%           | 18.41    | 0.004949                  | 13                      | 2  |
|                                                                                    |                                                                                             | Biological regulation/Cellular process/Developmental process/Immune system process                                  | negative regulation of cell growth           | 30306      | 0.23%     | 1.16%           | 5.13     | 0.018094                  | 70                      | 3  |
|                                                                                    |                                                                                             | Biological regulation/Cellular process/Growth                                                                       | cell structure disassembly during apoptosis  | 6921       | 0.07%     | 0.77%           | 11.40    | 0.012466                  | 21                      | 2  |
|                                                                                    | Biological regulation/Developmental process/Cellular process                                | apoptotic nuclear changes                                                                                           | 30262                                        | 0.07%      | 1.16%     | 15.61           | 0.000865 | 23                        | 3                       |    |
|                                                                                    |                                                                                             | negative regulation of neuron apoptosis                                                                             | 43524                                        | 0.19%      | 1.16%     | 6.19            | 0.011269 | 58                        | 3                       |    |
|                                                                                    |                                                                                             | positive regulation of anti-apoptosis                                                                               | 45768                                        | 0.14%      | 0.77%     | 5.44            | 0.043600 | 44                        | 2                       |    |
|                                                                                    |                                                                                             | regulation of muscle cell differentiation                                                                           | 51147                                        | 0.07%      | 0.77%     | 11.40           | 0.012466 | 21                        | 2                       |    |
|                                                                                    |                                                                                             | Biological regulation/Immune system process                                                                         | negative regulation of immune system process | 2983       | 0.26%     | 1.54%           | 5.84     | 0.004969                  | 82                      | 4  |
|                                                                                    |                                                                                             | Biological regulation/Multicellular organismal process                                                              | negative regulation of cytokine production   | 1618       | 0.05%     | 0.77%           | 17.10    | 0.005726                  | 14                      | 2  |
|                                                                                    |                                                                                             | Biological regulation/Multicellular organismal process/Developmental process/Cellular process/Immune system process | erythrocyte differentiation                  | 30216      | 0.20%     | 1.54%           | 7.85     | 0.001551                  | 61                      | 4  |
|                                                                                    |                                                                                             | Biological regulation/Response to stimulus                                                                          | negative regulation of response to stimulus  | 46566      | 0.22%     | 1.16%           | 6.38     | 0.016635                  | 67                      | 3  |
|                                                                                    |                                                                                             | Biological regulation/Response to stimulus/Immune system process                                                    | negative regulation of immune response       | 50777      | 0.08%     | 0.77%           | 14.96    | 0.003890                  | 24                      | 3  |
|                                                                                    |                                                                                             | Cellular process                                                                                                    | nuclear organization and biogenesis          | 6997       | 0.14%     | 1.54%           | 11.13    | 0.000426                  | 43                      | 4  |
|                                                                                    | cytoplasm organization and biogenesis                                                       |                                                                                                                     | 7028                                         | 0.05%      | 0.77%     | 14.96           | 0.007426 | 16                        | 2                       |    |
|                                                                                    | mesenchymal cell proliferation                                                              |                                                                                                                     | 10463                                        | 0.07%      | 0.77%     | 10.41           | 0.014770 | 23                        | 2                       |    |
|                                                                                    | cellular component disassembly                                                              |                                                                                                                     | 22411                                        | 0.07%      | 0.77%     | 11.40           | 0.012466 | 21                        | 2                       |    |
|                                                                                    | extracellular matrix organization and biogenesis                                            |                                                                                                                     | 30198                                        | 0.23%      | 1.93%     | 6.31            | 0.000316 | 72                        | 5                       |    |
|                                                                                    | collagen fibril organization                                                                |                                                                                                                     | 30199                                        | 0.06%      | 1.16%     | 19.95           | 0.000415 | 18                        | 3                       |    |
|                                                                                    | cell-matrix adhesion                                                                        |                                                                                                                     | 7160                                         | 0.30%      | 1.93%     | 6.44            | 0.000986 | 93                        | 5                       |    |
|                                                                                    | cell-substrate adhesion                                                                     |                                                                                                                     | 11590                                        | 0.33%      | 1.93%     | 6.77            | 0.001467 | 102                       | 6                       |    |
|                                                                                    | Cellular process/Biological adhesion/Multicellular organismal process/Developmental process |                                                                                                                     | cartilage condensation                       | 1502       | 0.05%     | 0.77%           | 15.86    | 0.006552                  | 15                      | 2  |
|                                                                                    | Cellular process/Metabolic process                                                          |                                                                                                                     | monosaccharide metabolic process             | 5996       | 0.80%     | 3.09%           | 5.12     | 0.000158                  | 187                     | 8  |
|                                                                                    |                                                                                             | glucose metabolic process                                                                                           | 6006                                         | 0.48%      | 2.70%     | 5.59            | 0.000239 | 150                       | 7                       |    |
|                                                                                    |                                                                                             | DNA catabolic process                                                                                               | 6308                                         | 0.10%      | 0.77%     | 7.72            | 0.025396 | 31                        | 2                       |    |
|                                                                                    |                                                                                             | glutathione metabolic process                                                                                       | 6749                                         | 0.10%      | 0.77%     | 7.72            | 0.025396 | 31                        | 2                       |    |
|                                                                                    |                                                                                             | cellular carbohydrate catabolic process                                                                             | 44275                                        | 0.33%      | 2.32%     | 7.04            | 0.000197 | 102                       | 6                       |    |
|                                                                                    |                                                                                             | alcohol catabolic process                                                                                           | 46164                                        | 0.26%      | 1.93%     | 7.30            | 0.000567 | 82                        | 5                       |    |
|                                                                                    |                                                                                             | axon regeneration                                                                                                   | 31103                                        | 0.08%      | 0.77%     | 9.58            | 0.017224 | 25                        | 2                       |    |
|                                                                                    |                                                                                             | Developmental process/Cellular process/Developmental process                                                        | uretic bud development                       | 1657       | 0.12%     | 0.77%           | 7.82     | 0.048113                  | 45                      | 2  |
|                                                                                    |                                                                                             | Developmental process                                                                                               | regeneration                                 | 31099      | 0.37%     | 2.32%           | 6.19     | 0.000896                  | 116                     | 6  |
|                                                                                    |                                                                                             | Developmental process/Biological regulation/Cellular process                                                        | anti-apoptosis                               | 6916       | 0.68%     | 3.86%           | 5.10     | 0.000010                  | 210                     | 10 |
|                                                                                    | Developmental process/Biological regulation/Cellular process/Metabolic process              | apoptotic program                                                                                                   | 9630                                         | 0.34%      | 1.93%     | 8.75            | 0.001593 | 104                       | 5                       |    |
|                                                                                    |                                                                                             | DNA fragmentation during apoptosis                                                                                  | 5309                                         | 0.05%      | 0.77%     | 14.96           | 0.007426 | 16                        | 2                       |    |
| neuron apoptosis                                                                   |                                                                                             | 51602                                                                                                               | 0.45%                                        | 2.32%      | 5.09      | 0.001038        | 141      | 6                         |                         |    |
| Developmental process/Growth                                                       |                                                                                             | developmental growth                                                                                                | 49599                                        | 0.45%      | 2.32%     | 5.17            | 0.000967 | 139                       | 6                       |    |
| Developmental process/Multicellular organismal process                             |                                                                                             | blood vessel remodeling                                                                                             | 1974                                         | 0.08%      | 0.77%     | 9.58            | 0.017224 | 25                        | 2                       |    |
| Developmental process/Multicellular organismal process/Biological regulation       |                                                                                             | regulation of bone mineralization                                                                                   | 39556                                        | 0.06%      | 0.77%     | 12.60           | 0.000401 | 18                        | 2                       |    |
| Localization                                                                       |                                                                                             | phosphate transport                                                                                                 | 6917                                         | 0.39%      | 2.70%     | 6.92            | 0.000005 | 121                       | 7                       |    |
| Localization/Cellular process                                                      |                                                                                             | blood vessel endothelial cell migration                                                                             | 43534                                        | 0.04%      | 0.77%     | 19.95           | 0.004223 | 12                        | 2                       |    |
| endothelial cell migration                                                         |                                                                                             | 43542                                                                                                               | 0.08%                                        | 0.77%      | 9.97      | 0.015979        | 24       | 3                         |                         |    |
| Metabolic process                                                                  |                                                                                             | carbohydrate catabolic process                                                                                      | 16052                                        | 0.34%      | 2.32%     | 6.84            | 0.000229 | 105                       | 6                       |    |
|                                                                                    | collagen metabolic process                                                                  | 32963                                                                                                               | 0.05%                                        | 0.77%      | 14.96     | 0.007426        | 16       | 2                         |                         |    |
|                                                                                    | glucose catabolic process                                                                   | 6007                                                                                                                | 0.24%                                        | 1.93%      | 8.20      | 0.000336        | 73       | 3                         |                         |    |
|                                                                                    | glycolysis                                                                                  | 6096                                                                                                                | 0.18%                                        | 1.93%      | 10.50     | 0.000107        | 57       | 5                         |                         |    |
|                                                                                    | RNA elongation                                                                              | 6354                                                                                                                | 0.05%                                        | 0.77%      | 17.10     | 0.005726        | 14       | 2                         |                         |    |
|                                                                                    | translational elongation                                                                    | 6414                                                                                                                | 0.07%                                        | 0.77%      | 10.88     | 0.013598        | 22       | 2                         |                         |    |
|                                                                                    | oxygen and reactive oxygen species metabolic process                                        | 6800                                                                                                                | 0.14%                                        | 0.77%      | 5.44      | 0.043600        | 44       | 2                         |                         |    |
|                                                                                    | proteasomal protein catabolic process                                                       | 10498                                                                                                               | 0.15%                                        | 0.77%      | 5.32      | 0.048113        | 45       | 2                         |                         |    |
|                                                                                    | protein sumoylation                                                                         | 16525                                                                                                               | 0.02%                                        | 0.77%      | 34.20     | 0.001401        | 7        | 2                         |                         |    |
|                                                                                    | hexose metabolic process                                                                    | 19318                                                                                                               | 0.59%                                        | 3.09%      | 5.20      | 0.000142        | 184      | 8                         |                         |    |
| Metabolic process/Cellular process                                                 | hexose catabolic process                                                                    | 19320                                                                                                               | 0.24%                                        | 1.93%      | 8.09      | 0.000357        | 74       | 5                         |                         |    |
|                                                                                    | lipoprotein metabolic process                                                               | 42157                                                                                                               | 0.22%                                        | 1.16%      | 5.20      | 0.017463        | 69       | 3                         |                         |    |
|                                                                                    | proteasomal ubiquitin-dependent protein catabolic process                                   | 43161                                                                                                               | 0.15%                                        | 0.77%      | 5.32      | 0.048113        | 45       | 2                         |                         |    |
|                                                                                    | monosaccharide catabolic process                                                            | 45395                                                                                                               | 0.24%                                        | 1.93%      | 8.09      | 0.000357        | 74       | 5                         |                         |    |
|                                                                                    | regulation of tissue remodeling                                                             | 34103                                                                                                               | 0.20%                                        | 1.16%      | 5.79      | 0.013461        | 62       | 3                         |                         |    |
|                                                                                    | bone resorption                                                                             | 45453                                                                                                               | 0.14%                                        | 0.77%      | 5.44      | 0.043600        | 44       | 2                         |                         |    |
|                                                                                    | regulation of bone remodeling                                                               | 49599                                                                                                               | 0.45%                                        | 2.32%      | 5.17      | 0.000967        | 139      | 6                         |                         |    |
|                                                                                    | determination of left/right symmetry                                                        | 7368                                                                                                                | 0.09%                                        | 0.77%      | 8.55      | 0.021167        | 28       | 2                         |                         |    |
|                                                                                    | determination of symmetry                                                                   | 9799                                                                                                                | 0.09%                                        | 0.77%      | 8.25      | 0.022546        | 29       | 2                         |                         |    |
|                                                                                    | determination of bilateral symmetry                                                         | 8655                                                                                                                | 0.09%                                        | 0.77%      | 8.25      | 0.022546        | 29       | 2                         |                         |    |
| Multicellular organismal process/Developmental process                             | limbic system development                                                                   | 21543                                                                                                               | 0.13%                                        | 0.77%      | 6.14      | 0.037659        | 39       | 2                         |                         |    |
|                                                                                    | hippocampus development                                                                     | 21761                                                                                                               | 0.06%                                        | 0.77%      | 11.97     | 0.011373        | 20       | 2                         |                         |    |
|                                                                                    | bone mineralization                                                                         | 21766                                                                                                               | 0.06%                                        | 0.77%      | 13.70     | 0.000112        | 18       | 2                         |                         |    |
|                                                                                    | cartilage development                                                                       | 30282                                                                                                               | 0.12%                                        | 1.16%      | 9.70      | 0.003378        | 37       | 3                         |                         |    |
|                                                                                    | bone mineralization                                                                         | 51216                                                                                                               | 0.24%                                        | 1.93%      | 8.09      | 0.000357        | 74       | 5                         |                         |    |
|                                                                                    | Multicellular organismal process/Developmental process/Cellular process                     | neuron maturation                                                                                                   | 42551                                        | 0.05%      | 0.77%     | 8.07            | 0.019819 | 27                        | 2                       |    |
|                                                                                    | Multicellular organismal process/Developmental process/Growth/Response to stimulus          | issue regeneration                                                                                                  | 42246                                        | 0.29%      | 2.32%     | 7.89            | 0.000107 | 81                        | 6                       |    |
|                                                                                    | Reproduction/Multicellular organismal process/Developmental process/Rhythmic process        | ovarian follicle development                                                                                        | 1541                                         | 0.13%      | 0.77%     | 5.84            | 0.041203 | 41                        | 2                       |    |
|                                                                                    | acute-phase response                                                                        | 9593                                                                                                                | 0.13%                                        | 0.77%      | 6.14      | 0.037659        | 39       | 2                         |                         |    |
|                                                                                    | response to toxin                                                                           | 9636                                                                                                                | 0.12%                                        | 0.77%      | 6.65      | 0.033003        | 36       | 2                         |                         |    |
| Response to stimulus                                                               | response to carbohydrate stimulus                                                           | 9743                                                                                                                | 0.16%                                        | 1.16%      | 6.30      | 0.010775        | 57       | 3                         |                         |    |
|                                                                                    | response to hexose stimulus                                                                 | 9746                                                                                                                | 0.16%                                        | 1.16%      | 7.04      | 0.008061        | 51       | 3                         |                         |    |
|                                                                                    | response to glucose stimulus                                                                | 9749                                                                                                                | 0.16%                                        | 1.16%      | 7.33      | 0.007251        | 49       | 3                         |                         |    |
|                                                                                    | response to amine stimulus                                                                  | 14075                                                                                                               | 0.11%                                        | 0.77%      | 6.84      | 0.031430        | 35       | 2                         |                         |    |
|                                                                                    | response to cytokine stimulus                                                               | 34097                                                                                                               | 0.06%                                        | 0.77%      | 11.97     | 0.011373        | 20       | 2                         |                         |    |
|                                                                                    | response to monosaccharide stimulus                                                         | 34284                                                                                                               | 0.16%                                        | 1.16%      | 7.04      | 0.008061        | 51       | 3                         |                         |    |
|                                                                                    | wound healing                                                                               | 42060                                                                                                               | 0.75%                                        | 3.86%      | 5.12      | 0.000025        | 234      | 10                        |                         |    |
|                                                                                    | response to hydrogen peroxide                                                               | 42542                                                                                                               | 0.19%                                        | 1.16%      | 5.98      | 0.012292        | 30       | 3                         |                         |    |
|                                                                                    | response to copper ion                                                                      | 46688                                                                                                               | 0.09%                                        | 0.77%      | 15.96     | 0.006552        | 15       | 2                         |                         |    |
|                                                                                    | response to axon injury                                                                     | 49678                                                                                                               | 0.09%                                        | 0.77%      | 8.25      | 0.022546        | 29       | 2                         |                         |    |
| Response to stimulus/Multicellular organismal process/Developmental process/Growth | neutrite regeneration                                                                       | 51102                                                                                                               | 0.08%                                        | 0.77%      | 8.55      | 0.021167        | 28       | 2                         |                         |    |
|                                                                                    | Cell                                                                                        | ER-Golgi intermediate compartment                                                                                   | 3173                                         | 0.12%      | 0.77%     | 12.28           | 0.002593 | 39                        | 4                       |    |
|                                                                                    | peroxisomal membrane                                                                        | 5178                                                                                                                | 0.14%                                        | 0.77%      | 5.44      | 0.043600        | 44       | 2                         |                         |    |
|                                                                                    | centriole                                                                                   | 5814                                                                                                                | 0.04%                                        | 0.77%      | 21.76     | 0.003548        | 11       | 2                         |                         |    |
|                                                                                    | late endosome membrane                                                                      | 31902                                                                                                               | 0.09%                                        | 0.77%      | 8.67      | 0.019819        | 27       | 2                         |                         |    |
|                                                                                    | microbody membrane                                                                          | 31903                                                                                                               | 0.14%                                        | 0.77%      | 5.44      | 0.043600        | 44       | 2                         |                         |    |
|                                                                                    | melanosome                                                                                  | 42470                                                                                                               | 0.31%                                        | 1.54%      | 5.04      | 0.007140        | 95       | 4                         |                         |    |
|                                                                                    | microtubule organizing center part                                                          | 44450                                                                                                               | 0.07%                                        | 0.77%      | 10.88     | 0.013598        | 22       | 2                         |                         |    |
|                                                                                    | segment granule                                                                             | 48700                                                                                                               | 0.31%                                        | 1.54%      | 5.04      | 0.007140        | 95       | 4                         |                         |    |
|                                                                                    | mitochondrial respiratory chain                                                             | 5746                                                                                                                | 0.14%                                        | 0.77%      | 5.57      | 0.044623        | 43       | 2                         |                         |    |
| Cellular Component                                                                 | Cell/Organelle/Envelope                                                                     | mitochondrial membrane part                                                                                         | 44455                                        | 0.21%      | 1.16%     | 5.52            | 0.015051 | 65                        | 3                       |    |
|                                                                                    | Cell/Organelle/Macromolecular complex                                                       | cytosolic ribosome                                                                                                  | 22526                                        | 0.14%      | 0.77%     | 5.57            | 0.044623 | 43                        | 2                       |    |
|                                                                                    | proteinaceous extracellular matrix                                                          | 5578                                                                                                                | 0.96%                                        | 5.41%      | 5.62      | 0.000000        | 298      | 14                        |                         |    |
|                                                                                    | collagen                                                                                    | 5581                                                                                                                | 0.25%                                        | 1.54%      | 6.22      | 0.003523        | 77       | 4                         |                         |    |
|                                                                                    | barrier collagen                                                                            | 5583                                                                                                                | 0.11%                                        | 0.77%      | 7.04      | 0.026862        | 34       | 2                         |                         |    |
|                                                                                    | basement membrane                                                                           | 5604                                                                                                                | 0.26%                                        | 1.93%      | 7.48      | 0.000008        | 80       | 5                         |                         |    |
|                                                                                    | extracellular matrix                                                                        | 31012                                                                                                               | 1.02%                                        | 5.41%      | 5.30      | 0.000000        | 316      | 14                        |                         |    |
|                                                                                    | extracellular matrix part                                                                   | 44450                                                                                                               | 0.07%                                        | 0.77%      | 10.88     | 0.000000        | 156      | 9                         |                         |    |
|                                                                                    | Macromolecular complex/Cell                                                                 | eukaryotic translation elongation factor 1 complex                                                                  | 5853                                         | 0.03%      | 0.77%     | 29.92           | 0.001852 | 8                         | 2                       |    |
|                                                                                    | Organelle/Cell                                                                              | transport vesicle                                                                                                   | 61313                                        | 0.24%      | 1.54%     | 6.38            | 0.002171 | 75                        | 4                       |    |
| Organelle/Cell/Macromolecular complex                                              | intrinsinc to Golgi membrane                                                                | 31228                                                                                                               | 0.12%                                        | 0.77%      | 8.47      | 0.034599        | 37       | 2                         |                         |    |
|                                                                                    | cytosolic small ribosomal subunit                                                           | 22627                                                                                                               | 0.11%                                        | 0.77%      | 6.84      | 0.031430        | 35       | 2                         |                         |    |
|                                                                                    | Antioxidant activity                                                                        | 16209                                                                                                               | 0.16%                                        | 1.16%      | 7.18      | 0.007659        | 50       | 3                         |                         |    |
|                                                                                    | integrin binding                                                                            | 5178                                                                                                                | 0.12%                                        | 0.77%      | 6.47      | 0.034599        | 37       | 2                         |                         |    |
|                                                                                    | selenium binding                                                                            | 8430                                                                                                                | 0.08%                                        | 0.77%      | 9.97      | 0.015979        | 24       | 2                         |                         |    |
|                                                                                    | rRNA binding                                                                                | 19843                                                                                                               | 0.07%                                        | 1.16%      | 17.10     | 0.000860        | 21       | 3                         |                         |    |
|                                                                                    | calcium-dependent protein binding                                                           | 48306                                                                                                               | 0.07%                                        | 0.77%      | 10.41     | 0.014770        | 23       | 2                         |                         |    |
|                                                                                    | NAD binding                                                                                 | 51287                                                                                                               | 0.17%                                        | 1.16%      | 6.91      | 0.008484        | 52       | 3                         |                         |    |
|                                                                                    | Binding/Translation regulator activity                                                      | translation elongation factor activity                                                                              | 5746                                         | 0.09%      | 1.16%     | 12.38           | 0.001088 | 29                        | 3                       |    |
|                                                                                    | heme-copper terminal oxidase activity                                                       | 15002                                                                                                               | 0.06%                                        | 0.77%      | 11.97     | 0.011373        | 20       | 2                         |                         |    |
| Catalytic activity                                                                 | steroid dehydrogenase activity                                                              | 16229                                                                                                               | 0.09%                                        | 0.77%      | 8.25      | 0.022546        | 29       | 2                         |                         |    |
|                                                                                    | oxidoreductase activity, acting on heme group of donors                                     | 16675                                                                                                               | 0.06%                                        | 0.77%      | 11.97     | 0.011373        | 20       | 2                         |                         |    |
|                                                                                    | oxidoreductase activity, acting on heme group of donors, oxygen as acceptor                 | 16676                                                                                                               | 0.06%                                        | 0.77%      | 11.97     | 0.011373        | 20       | 2                         |                         |    |
|                                                                                    | oxidoreductase activity, oxidizing metal ions                                               | 16677                                                                                                               | 0.06%                                        | 0.77%      | 11.97     | 0.011373        | 20       | 2                         |                         |    |
|                                                                                    | oxidoreductase activity, oxidizing metal ions                                               | 16678                                                                                                               | 0.06%                                        | 0.77%      | 11.97     | 0.011373        | 20       | 2                         |                         |    |
|                                                                                    | intracellular protein transferase activity, phosphotransferases                             | 16688                                                                                                               | 0.05%                                        | 0.77%      | 17.10     | 0.005726        | 14       | 2                         |                         |    |
|                                                                                    | Structural molecule activity                                                                | transmembrane protein channel component                                                                             | 6100                                         | 0.33%      | 1.93%     | 6.92            | 0.000007 | 101                       | 6                       |    |
|                                                                                    | Transporter activity/Catalytic activity                                                     | cytochrome c oxidase activity                                                                                       | 4129                                         | 0.08%      | 0.77%     | 11.97           | 0.011373 | 20                        | 2                       |    |

**Supplementary Table 2.** Reserve Zone (RZ) 16 enriched pathways from the differential expression analysis showing hypergeometric p values less than 0.05 and probe sets in your list greater than 4. These pathways were derived from the entire RZ gene list showing differential upregulation at 16 days. Gray indicated pathways associated with BCMSD.

| GO Parent Category | Go Parent Term                                                                     | GO (Child) Term                             | GO ID | % of Array | % of list | Fold Enrichment | P-Value  | Total Probe Sets On Array | Probe Sets in Your List |
|--------------------|------------------------------------------------------------------------------------|---------------------------------------------|-------|------------|-----------|-----------------|----------|---------------------------|-------------------------|
| Biological Process | Cellular process/Metabolic process                                                 | cellular carbohydrate catabolic process     | 44275 | 0.33%      | 2.32%     | 7.04            | 0.000197 | 102                       | 6                       |
|                    |                                                                                    | glucose metabolic process                   | 6006  | 0.48%      | 2.70%     | 5.59            | 0.000239 | 150                       | 7                       |
|                    |                                                                                    | monosaccharide metabolic process            | 5996  | 0.60%      | 3.09%     | 5.12            | 0.000158 | 187                       | 8                       |
|                    | Developmental process                                                              | regeneration                                | 31089 | 0.37%      | 2.32%     | 6.19            | 0.000386 | 116                       | 6                       |
|                    |                                                                                    | anti-apoptosis                              | 6916  | 0.68%      | 3.86%     | 5.70            | 0.000010 | 210                       | 10                      |
|                    | Developmental process/Biological regulation/Cellular process                       | neuron apoptosis                            | 51402 | 0.45%      | 2.32%     | 5.09            | 0.001038 | 141                       | 6                       |
|                    |                                                                                    | developmental growth                        | 48589 | 0.45%      | 2.32%     | 5.17            | 0.000967 | 139                       | 6                       |
|                    | Developmental process/Cellular process                                             | phosphate transport                         | 6817  | 0.39%      | 2.70%     | 6.92            | 0.000065 | 121                       | 7                       |
|                    |                                                                                    | localization                                | 16052 | 0.34%      | 2.32%     | 6.84            | 0.000229 | 105                       | 6                       |
|                    | Metabolic process                                                                  | carbohydrate catabolic process              | 19318 | 0.59%      | 3.09%     | 5.20            | 0.000142 | 184                       | 8                       |
|                    |                                                                                    | hexose metabolic process                    | 42246 | 0.29%      | 2.32%     | 7.89            | 0.000107 | 91                        | 6                       |
|                    | Multicellular organismal process/Developmental process/Growth/Response to stimulus | tissue regeneration                         | 42060 | 0.75%      | 3.86%     | 5.12            | 0.000025 | 234                       | 10                      |
|                    |                                                                                    | wound healing                               | 31012 | 1.02%      | 5.41%     | 5.30            | 0.000000 | 316                       | 14                      |
|                    | Response to stimulus                                                               | extracellular matrix                        | 44420 | 0.50%      | 3.47%     | 6.91            | 0.000006 | 156                       | 9                       |
|                    |                                                                                    | proteinaceous extracellular matrix          | 5578  | 0.96%      | 5.41%     | 5.62            | 0.000000 | 298                       | 14                      |
| Cellular Component | Extracellular region                                                               | extracellular matrix structural constituent | 5201  | 0.33%      | 2.32%     | 7.11            | 0.000187 | 101                       | 6                       |

**Supplementary Table 3.** PZ 35 enriched pathways from the cluster analysis showing hypergeometric p values less than 0.05. These pathways were derived from the entire PZ gene list showing differential upregulation at 16 days (compared to non-irradiated chondrocytes). Gray indicates a pathways association with BCMSD.

| GO Category | GO ID | GO Term                                     | % of Array | % of List | Fold Enrichment | P Value  | Total Probe Sets On Array | Probe Sets in Our List |
|-------------|-------|---------------------------------------------|------------|-----------|-----------------|----------|---------------------------|------------------------|
| Biological  | 7229  | integrin-mediated signaling pathway         | 0.14%      | 22.22%    | 160.21          | 0.000067 | 43                        | 2                      |
|             | 9612  | response to mechanical stimulus             | 0.35%      | 22.22%    | 63.79           | 0.000423 | 108                       | 2                      |
|             | 6817  | phosphate transport                         | 0.39%      | 22.22%    | 56.93           | 0.000529 | 121                       | 2                      |
|             | 1503  | ossification                                | 0.73%      | 33.33%    | 45.93           | 0.000030 | 225                       | 3                      |
|             | 31214 | biomineral formation                        | 0.73%      | 33.33%    | 45.52           | 0.000031 | 227                       | 3                      |
|             | 46849 | bone remodeling                             | 0.82%      | 33.33%    | 40.68           | 0.000043 | 254                       | 3                      |
|             | 48771 | tissue remodeling                           | 0.98%      | 33.33%    | 33.88           | 0.000075 | 305                       | 3                      |
|             | 1501  | skeletal development                        | 1.05%      | 33.33%    | 31.79           | 0.000090 | 325                       | 3                      |
|             | 48545 | response to steroid hormone stimulus        | 0.71%      | 22.22%    | 31.31           | 0.001718 | 220                       | 2                      |
|             | 15698 | inorganic anion transport                   | 0.75%      | 22.22%    | 29.82           | 0.001890 | 231                       | 2                      |
|             | 6820  | anion transport                             | 0.85%      | 22.22%    | 26.19           | 0.002433 | 263                       | 2                      |
|             | 9725  | response to hormone stimulus                | 1.09%      | 22.22%    | 20.38           | 0.003954 | 338                       | 2                      |
|             | 9888  | tissue development                          | 1.67%      | 33.33%    | 19.95           | 0.000352 | 518                       | 3                      |
|             | 9719  | response to endogenous stimulus             | 1.24%      | 22.22%    | 17.89           | 0.005077 | 385                       | 2                      |
|             | 9628  | response to abiotic stimulus                | 1.42%      | 22.22%    | 15.62           | 0.006578 | 441                       | 2                      |
|             | 6508  | proteolysis                                 | 2.24%      | 22.22%    | 9.93            | 0.015383 | 694                       | 2                      |
|             | 48513 | organ development                           | 5.83%      | 55.56%    | 9.54            | 0.000066 | 1806                      | 5                      |
|             | 9605  | response to external stimulus               | 2.87%      | 22.22%    | 7.75            | 0.024135 | 889                       | 2                      |
|             | 48731 | system development                          | 7.51%      | 55.56%    | 7.40            | 0.000219 | 2327                      | 5                      |
|             | 6811  | ion transport                               | 3.13%      | 22.22%    | 7.09            | 0.028250 | 971                       | 2                      |
|             | 48856 | anatomical structure development            | 8.36%      | 55.56%    | 6.64            | 0.000363 | 2593                      | 5                      |
|             | 42221 | response to chemical stimulus               | 3.44%      | 22.22%    | 6.47            | 0.033250 | 1065                      | 2                      |
|             | 7275  | multicellular organismal development        | 8.77%      | 55.56%    | 6.33            | 0.000452 | 2719                      | 5                      |
| Cellular    | 5581  | collagen                                    | 0.25%      | 33.33%    | 134.20          | 0.000001 | 77                        | 3                      |
|             | 44420 | extracellular matrix part                   | 0.50%      | 44.44%    | 88.32           | 0.000000 | 156                       | 4                      |
|             | 5578  | proteinaceous extracellular matrix          | 0.96%      | 66.67%    | 69.35           | 0.000000 | 298                       | 6                      |
|             | 31012 | extracellular matrix                        | 1.02%      | 66.67%    | 65.40           | 0.000000 | 316                       | 6                      |
|             | 44421 | extracellular region part                   | 2.26%      | 66.67%    | 29.48           | 0.000000 | 701                       | 6                      |
|             | 5576  | extracellular region                        | 4.30%      | 66.67%    | 15.49           | 0.000000 | 1334                      | 6                      |
| Molecular   | 4222  | metalloendopeptidase activity               | 0.26%      | 22.22%    | 85.05           | 0.000238 | 81                        | 2                      |
|             | 5201  | extracellular matrix structural constituent | 0.33%      | 22.22%    | 68.21           | 0.000370 | 101                       | 2                      |
|             | 8237  | metallopeptidase activity                   | 0.51%      | 22.22%    | 43.33           | 0.000908 | 159                       | 2                      |
|             | 4175  | endopeptidase activity                      | 1.25%      | 22.22%    | 17.75           | 0.005153 | 388                       | 2                      |
|             | 8233  | peptidase activity                          | 1.91%      | 22.22%    | 11.66           | 0.011421 | 591                       | 2                      |
|             | 5198  | structural molecule activity                | 2.02%      | 22.22%    | 11.02           | 0.012674 | 625                       | 2                      |

\* Gray shading includes GO Terms involved in BCMSD

**Supplementary Table 4.** PC 53 enriched pathways from cluster analysis of cluster (1,1) and 5 enriched pathways from cluster (1,2) showing hypergeometric p values less than 0.05. These pathways were derived from the entire PC gene list showing differential upregulation at 16 days (compared to non-irradiated chondrocytes). Gray indicates a pathways association with BCMSD.

| GP Zone          | GO Category | GO ID | GO Term                                                                            | % of Array | % of List | Fold Enrichment | P-Value  | Total Probe Sets | Probe Sets in Our List |
|------------------|-------------|-------|------------------------------------------------------------------------------------|------------|-----------|-----------------|----------|------------------|------------------------|
| PC Cluster (1,1) | Biological  | 51924 | regulation of calcium ion transport                                                | 0.13%      | 10.00%    | 75.61           | 0.000317 | 41               | 2                      |
|                  |             | 1569  | patterning of blood vessels                                                        | 0.15%      | 10.00%    | 68.89           | 0.000382 | 45               | 2                      |
|                  |             | 43269 | regulation of ion transport                                                        | 0.19%      | 10.00%    | 52.54           | 0.000655 | 59               | 2                      |
|                  |             | 48754 | branching morphogenesis of a tube                                                  | 0.30%      | 15.00%    | 50.54           | 0.000027 | 92               | 3                      |
|                  |             | 1763  | morphogenesis of a branching structure                                             | 0.33%      | 15.00%    | 45.59           | 0.000037 | 102              | 3                      |
|                  |             | 9880  | embryonic pattern specification                                                    | 0.24%      | 10.00%    | 42.47           | 0.000997 | 73               | 2                      |
|                  |             | 50678 | regulation of epithelial cell proliferation                                        | 0.26%      | 10.00%    | 37.80           | 0.001254 | 82               | 2                      |
|                  |             | 50673 | epithelial cell proliferation                                                      | 0.29%      | 10.00%    | 34.07           | 0.001538 | 91               | 2                      |
|                  |             | 32101 | regulation of response to external stimulus                                        | 0.35%      | 10.00%    | 28.97           | 0.002110 | 107              | 2                      |
|                  |             | 1666  | response to hypoxia                                                                | 0.62%      | 15.00%    | 24.35           | 0.000237 | 191              | 3                      |
|                  |             | 30334 | regulation of cell migration                                                       | 0.43%      | 10.00%    | 23.31           | 0.003216 | 133              | 2                      |
|                  |             | 14070 | response to organic cyclic substance                                               | 0.44%      | 10.00%    | 22.79           | 0.003358 | 136              | 2                      |
|                  |             | 51270 | regulation of cell motility                                                        | 0.48%      | 10.00%    | 20.81           | 0.004002 | 149              | 2                      |
|                  |             | 1525  | angiogenesis                                                                       | 0.74%      | 15.00%    | 20.22           | 0.000406 | 230              | 3                      |
|                  |             | 35239 | tube morphogenesis                                                                 | 0.86%      | 15.00%    | 17.42           | 0.000623 | 267              | 3                      |
|                  |             | 6816  | calcium ion transport                                                              | 0.64%      | 10.00%    | 15.58           | 0.006946 | 199              | 2                      |
|                  |             | 48514 | blood vessel morphogenesis                                                         | 0.99%      | 15.00%    | 15.10           | 0.000936 | 308              | 3                      |
|                  |             | 55074 | calcium ion homeostasis                                                            | 0.69%      | 10.00%    | 14.49           | 0.007965 | 214              | 2                      |
|                  |             | 48646 | anatomical structure formation                                                     | 1.07%      | 15.00%    | 13.96           | 0.001167 | 333              | 3                      |
|                  |             | 55065 | metal ion homeostasis                                                              | 0.74%      | 10.00%    | 13.60           | 0.008970 | 228              | 2                      |
|                  |             | 15674 | di-, tri-valent inorganic cation transport                                         | 0.75%      | 10.00%    | 13.36           | 0.009266 | 232              | 2                      |
|                  |             | 1568  | blood vessel development                                                           | 1.13%      | 15.00%    | 13.32           | 0.001333 | 349              | 3                      |
|                  |             | 1944  | vasculature development                                                            | 1.14%      | 15.00%    | 13.14           | 0.001387 | 354              | 3                      |
|                  |             | 35295 | tube development                                                                   | 1.17%      | 15.00%    | 12.85           | 0.001477 | 362              | 3                      |
|                  |             | 55066 | di-, tri-valent inorganic cation homeostasis                                       | 0.84%      | 10.00%    | 11.97           | 0.011373 | 259              | 2                      |
|                  |             | 7389  | pattern specification process                                                      | 0.89%      | 10.00%    | 11.19           | 0.012875 | 277              | 2                      |
|                  |             | 8015  | blood circulation                                                                  | 0.92%      | 10.00%    | 10.92           | 0.013480 | 284              | 2                      |
|                  |             | 3013  | circulatory system process                                                         | 0.92%      | 10.00%    | 10.92           | 0.013480 | 284              | 2                      |
|                  |             | 48583 | regulation of response to stimulus                                                 | 0.92%      | 10.00%    | 10.84           | 0.013655 | 286              | 2                      |
|                  |             | 55080 | cation homeostasis                                                                 | 0.96%      | 10.00%    | 10.37           | 0.014813 | 299              | 2                      |
|                  |             | 10033 | response to organic substance                                                      | 1.05%      | 10.00%    | 9.57            | 0.017145 | 324              | 2                      |
|                  |             | 16477 | cell migration                                                                     | 1.60%      | 15.00%    | 9.39            | 0.003515 | 495              | 3                      |
|                  |             | 51049 | regulation of transport                                                            | 1.10%      | 10.00%    | 9.12            | 0.018706 | 340              | 2                      |
|                  |             | 32879 | regulation of localization                                                         | 1.12%      | 10.00%    | 8.96            | 0.019305 | 346              | 2                      |
|                  |             | 6928  | cell motility                                                                      | 1.77%      | 15.00%    | 8.45            | 0.004678 | 550              | 3                      |
|                  |             | 51674 | localization of cell                                                               | 1.77%      | 15.00%    | 8.45            | 0.004678 | 550              | 3                      |
|                  |             | 9887  | organ morphogenesis                                                                | 2.26%      | 15.00%    | 6.62            | 0.008945 | 702              | 3                      |
|                  |             | 50801 | ion homeostasis                                                                    | 1.58%      | 10.00%    | 6.34            | 0.035477 | 489              | 2                      |
|                  |             | 42221 | response to chemical stimulus                                                      | 3.44%      | 20.00%    | 5.82            | 0.003844 | 1065             | 4                      |
|                  |             | 2376  | immune system process                                                              | 2.66%      | 15.00%    | 5.64            | 0.013515 | 824              | 3                      |
|                  |             | 48878 | chemical homeostasis                                                               | 1.80%      | 10.00%    | 5.56            | 0.044361 | 558              | 2                      |
|                  |             | 9790  | embryonic development                                                              | 1.85%      | 10.00%    | 5.41            | 0.046367 | 573              | 2                      |
|                  |             | 8283  | cell proliferation                                                                 | 2.78%      | 15.00%    | 5.39            | 0.015147 | 862              | 3                      |
|                  |             | 9605  | response to external stimulus                                                      | 2.87%      | 15.00%    | 5.23            | 0.016366 | 889              | 3                      |
|                  |             | 51094 | positive regulation of developmental process                                       | 1.92%      | 10.00%    | 5.20            | 0.049489 | 596              | 2                      |
|                  |             | 31965 | nuclear membrane                                                                   | 0.42%      | 10.00%    | 24.03           | 0.003032 | 129              | 2                      |
|                  |             | 5635  | nuclear envelope                                                                   | 0.65%      | 10.00%    | 15.35           | 0.007145 | 202              | 2                      |
|                  |             | 8528  | peptide receptor activity, G-protein coupled                                       | 0.42%      | 10.00%    | 23.66           | 0.003124 | 131              | 2                      |
|                  |             | 1653  | peptide receptor activity                                                          | 0.42%      | 10.00%    | 23.66           | 0.003124 | 131              | 2                      |
|                  |             | 42277 | peptide binding                                                                    | 0.76%      | 10.00%    | 13.19           | 0.009491 | 235              | 2                      |
|                  |             | 1584  | rhodopsin-like receptor activity                                                   | 1.25%      | 10.00%    | 7.97            | 0.023801 | 389              | 2                      |
|                  |             | 4930  | G-protein coupled receptor activity                                                | 1.57%      | 10.00%    | 6.35            | 0.035353 | 488              | 2                      |
|                  |             | 4888  | transmembrane receptor activity                                                    | 2.93%      | 15.00%    | 5.12            | 0.017253 | 908              | 3                      |
| PC Cluster (1,2) | Molecular   | 5543  | phospholipid binding                                                               | 0.51%      | 13.33%    | 26.16           | 0.002538 | 158              | 2                      |
|                  |             | 8289  | lipid binding                                                                      | 1.45%      | 13.33%    | 9.21            | 0.018196 | 449              | 2                      |
|                  |             | 16462 | pyrophosphatase activity                                                           | 1.96%      | 13.33%    | 6.79            | 0.031284 | 609              | 2                      |
|                  |             | 16818 | hydrolase activity, acting on acid anhydrides, in phosphorus-containing anhydrides | 1.97%      | 13.33%    | 6.75            | 0.031553 | 612              | 2                      |
|                  |             | 16817 | hydrolase activity, acting on acid anhydrides                                      | 1.99%      | 13.33%    | 6.70            | 0.032003 | 617              | 2                      |

**Supplementary Table 5.** HZ 18 enriched pathways from cluster analysis of cluster (2,2) showing hypergeometric p values less than 0.05. These pathways were derived from the entire HZ gene list showing differential upregulation at 16 days (compared to non-irradiated chondrocytes). Gray indicates a pathways association with BCMSD.

| GO Category | GO ID | GO Term                           | % of Array | % of List | Fold Enrichment | P value  | Total Probe Sets | Probe Sets in Our List |
|-------------|-------|-----------------------------------|------------|-----------|-----------------|----------|------------------|------------------------|
| Biological  | 6783  | heme biosynthetic process         | 0.05%      | 11.76%    | 260.50          | 0.000026 | 14               | 2                      |
|             | 42168 | heme metabolic process            | 0.06%      | 11.76%    | 202.61          | 0.000043 | 18               | 2                      |
|             | 6779  | porphyrin biosynthetic process    | 0.09%      | 11.76%    | 125.76          | 0.000113 | 29               | 2                      |
|             | 33014 | tetrapyrrole biosynthetic process | 0.09%      | 11.76%    | 125.76          | 0.000113 | 29               | 2                      |
|             | 46148 | pigment biosynthetic process      | 0.10%      | 11.76%    | 113.97          | 0.000138 | 32               | 2                      |
|             | 6778  | porphyrin metabolic process       | 0.12%      | 11.76%    | 101.31          | 0.000175 | 36               | 2                      |
|             | 33013 | tetrapyrrole metabolic process    | 0.12%      | 11.76%    | 101.31          | 0.000175 | 36               | 2                      |
|             | 42440 | pigment metabolic process         | 0.12%      | 11.76%    | 95.98           | 0.000196 | 38               | 2                      |
|             | 19748 | secondary metabolic process       | 0.20%      | 11.76%    | 58.82           | 0.000520 | 62               | 2                      |
|             | 6935  | chemotaxis                        | 0.35%      | 17.65%    | 51.13           | 0.000026 | 107              | 3                      |
|             | 42330 | taxis                             | 0.35%      | 17.65%    | 51.13           | 0.000026 | 107              | 3                      |
|             | 51188 | cofactor biosynthetic process     | 0.34%      | 11.76%    | 35.07           | 0.001443 | 104              | 2                      |
|             | 46483 | heterocycle metabolic process     | 0.42%      | 11.76%    | 28.27           | 0.002197 | 129              | 2                      |
|             | 7626  | locomotory behavior               | 0.76%      | 17.65%    | 23.08           | 0.000270 | 237              | 3                      |
|             | 6952  | defense response                  | 1.49%      | 17.65%    | 11.87           | 0.001804 | 461              | 3                      |
|             | 7610  | behavior                          | 1.60%      | 17.65%    | 11.05           | 0.002200 | 495              | 3                      |
|             | 9605  | response to external stimulus     | 2.87%      | 23.53%    | 8.20            | 0.001097 | 889              | 4                      |
|             | 42221 | response to chemical stimulus     | 3.44%      | 23.53%    | 6.85            | 0.002096 | 1065             | 4                      |
